# Supplementary material for: Nickel hydroxide–nickel nanohybrids indirectly from coordination microfibers for high-performance supercapacitor electrodes
Source: Royal Society of Chemistry journal article supplement (doi:10.1039/c4qi00145a), 2014-12-03
Supplement: c4qi00145a1.pdf [file c4qi00145a1.pdf]

**Electronic supplementary material**

**Nickel hydroxide-nickel nanohybrids indirectly from coordination microfibers  
for high-performance supercapacitor electrodes**

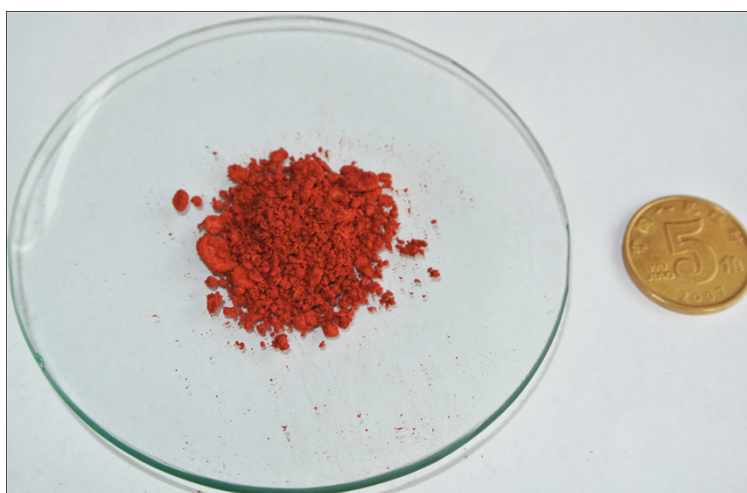

**Figure S1** Optical photo of as-prepared Ni-DMG samples

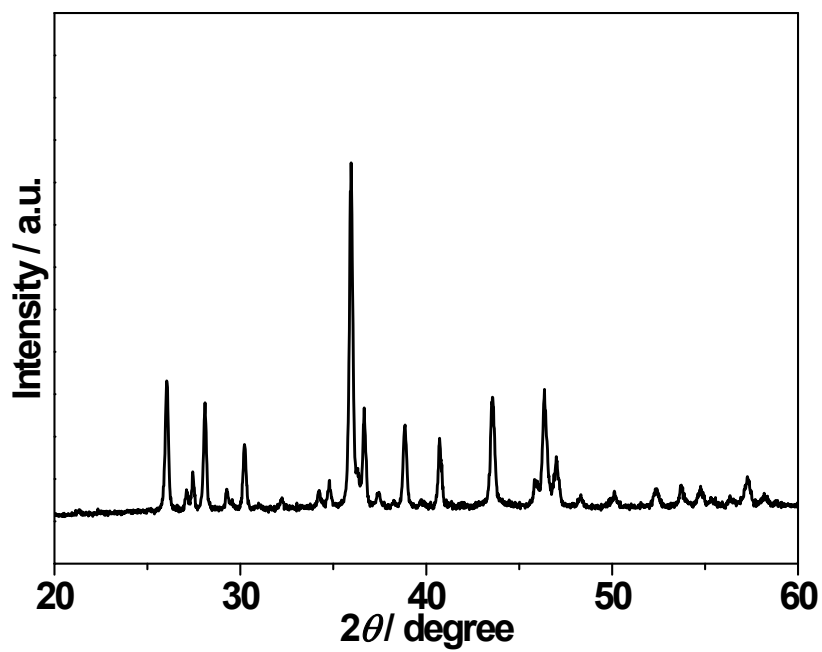

**Figure S2** XRD pattern of as-prepared Ni-DMG samples.

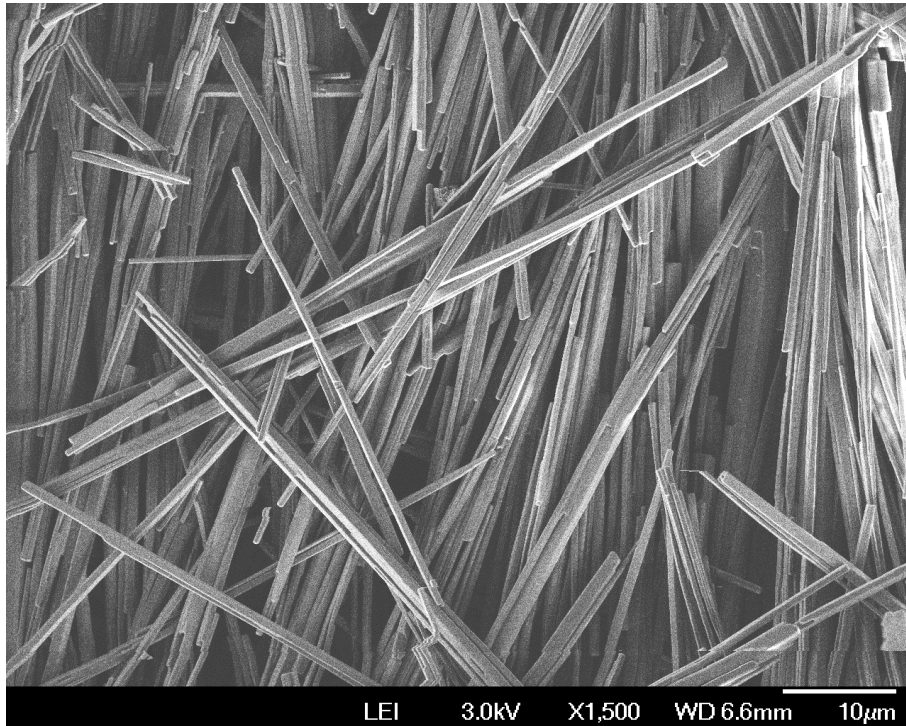

**Figure S3** SEM image of as-prepared Ni-DMG microfibers

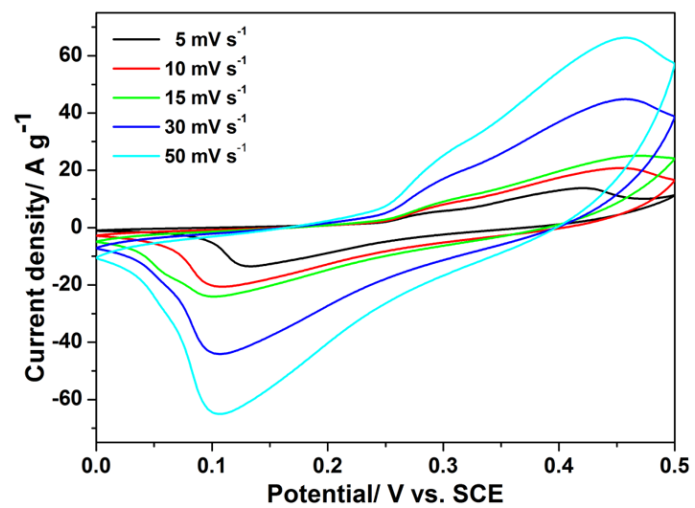

**Figure S4** CV curves of Ni(OH)<sub>2</sub>-Ni nanohybrids electrode materials at different scan rates.
